# Supplementary material
Source: PubMed Central journal article supplement (PMC2517642)
Supplement: neo1009_0973SD1.pdf [file neo1009_0973SD1.pdf]

**Table W1.** Clinical and Histopathologic Data; Quantitative RT-PCR Measurements.

| Patient No. | Age (years) | Survival (months) | Censor | Stages | R-Status | HPRT (fg/ $\mu$ l) | hTERT (ag/ $\mu$ l) | hTERT (ag/fg HPRT) |
|-------------|-------------|-------------------|--------|--------|----------|--------------------|---------------------|--------------------|
| 1           | 59          | 13                | 1      | 3      | 0        | 55.073             | 4551.100            | 82.638             |
| 2           | 53          | 16                | 1      | 3      | 0        | 955.129            | 13506.410           | 14.141             |
| 3           | 60          | 21                | 1      | 2      | 0        | 262.407            | 30491.030           | 116.197            |
| 4           | 64          | 39                | 2      | 2      | 1        | 1069.529           | 116479.350          | 108.907            |
| 5           | 40          | 19                | 1      | 3      | 0        | 7858.380           | 406902.390          | 51.779             |
| 6           | 59          | 24                | 1      | 3      | 0        | 231.136            | 0.000               | 0.000              |
| 7           | 47          | 20                | 1      | 3      | 0        | 386.544            | 0.000               | 0.000              |
| 8           | 46          | 15                | 1      | 3      | 0        | 173.775            | 0.000               | 0.000              |
| 9           | 71          | 5                 | 1      | 2      | 1        | 373.211            | 0.000               | 0.000              |
| 10          | 66          | 4                 | 1      | 4      | 2        | 27.898             | 1451.890            | 52.042             |
| 11          | 70          | 15                | 1      | 3      | 1        | 39.054             | 672.190             | 17.212             |
| 12          | 67          | 6                 | 1      | 3      | 0        | 19.760             | 2330.960            | 117.963            |
| 13          | 74          | 3                 | 1      | 4      | 2        | 363.078            | 10704.520           | 29.483             |
| 14          | 75          | 49                | 1      | 3      | 0        | 578.892            | 0.000               | 0.000              |
| 15          | 49          | 22                | 1      | 3      | 0        | 189.006            | 0.000               | 0.000              |
| 16          | 70          | 4                 | 1      | 3      | 0        | 45.324             | 0.000               | 0.000              |
| 17          | 68          | 11                | 1      | 2      | 0        | 265.628            | 0.000               | 0.000              |
| 18          | 72          | 33                | 1      | 3      | 1        | 206.232            | 0.000               | 0.000              |
| 19          | 73          | 1                 | 4      | 3      | 0        | 28.330             | 0.000               | 0.000              |
| 20          | 58          | 43                | 1      | 3      | 0        | 1163.919           | 86123.510           | 73.994             |
| 21          | 74          | 61                | 2      | 3      | 0        | 2410.464           | 0.000               | 0.000              |
| 22          | 69          | 15                | 1      | 4      | 2        | 149.650            | 2045.880            | 13.671             |
| 23          | 43          | 2                 | 1      | 4      | 2        | 726.099            | 8015.350            | 11.039             |
| 24          | 56          | 5                 | 1      | 4      | 2        | 682.589            | 0.000               | 0.000              |
| 25          | 48          | 9                 | 1      | 3      | 0        | 38.549             | 0.000               | 0.000              |
| 26          | 70          | 8                 | 1      | 4      | 2        | 493.055            | 14326.020           | 29.056             |
| 27          | 76          | 15                | 1      | 2      | 0        | 274.007            | 0.000               | 0.000              |
| 28          | 57          | 3                 | 1      | 4      | 0        | 1474.944           | 1223.100            | 0.829              |
| 29          | 61          | 14                | 1      | 3      | 0        | 512.313            | 3354.430            | 6.548              |
| 30          | 69          | 9                 | 1      | 3      | 0        | 262.491            | 12208.950           | 46.512             |
| 31          | 47          | 2                 | 1      | 3      | 0        | 90.737             | 1961.580            | 21.618             |
| 32          | 52          | 29                | 1      | 2      | 0        | 467.628            | 0.000               | 0.000              |
| 33          | 38          | 4                 | 1      | 4      | 2        | 138.001            | 0.000               | 0.000              |
| 34          | 65          | 16                | 1      | 2      | 0        | 105.754            | 6372.660            | 60.259             |
| 35          | 75          | 13                | 1      | 2      | 0        | 914.723            | 8537.610            | 9.334              |
| 36          | 60          | 4                 | 1      | 4      | 1        | 943.189            | 0.000               | 0.000              |
| 37          | 61          | 37                | 1      | 3      | 0        | 466.807            | 0.000               | 0.000              |
| 38          | 62          | 16                | 1      | 2      | 1        | 136.162            | 0.000               | 0.000              |
| 39          | 80          | 33                | 1      | 3      | 0        | 92.629             | 0.000               | 0.000              |
| 40          | 69          | 1                 | 4      | 3      | 0        | 343.182            | 0.000               | 0.000              |
| 41          | 42          | 3                 | 1      | 4      | 2        | 259.850            | 114535.130          | 440.775            |
| 42          | 52          | 28                | 2      | 3      | 0        | 5.231              | 0.000               | 0.000              |
| 43          | 52          | 13                | 1      | 3      | 0        | 38.957             | 0.000               | 0.000              |
| 44          | 71          | 23                | 1      | 2      | 0        | 71.127             | 0.000               | 0.000              |
| 45          | 64          | 23                | 2      | 3      | 0        | 121.342            | 0.000               | 0.000              |
| 46          | 69          | 19                | 2      | 3      | 0        | 458.081            | 0.000               | 0.000              |
| 47          | 68          | 19                | 2      | 1      | 0        | 1453.104           | 0.000               | 0.000              |
| 48          | 34          | 6                 | 1      | 3      | 1        | 943.603            | 54612.080           | 57.876             |
| 49          | 61          | 12                | 1      | 1      | 0        | 209.867            | 7199.790            | 34.306             |
| 50          | 71          | 12                | 1      | 2      | 0        | 28.472             | 0.000               | 0.000              |
| 51          | 66          | 17                | 1      | 3      | 0        | 129.289            | 0.000               | 0.000              |
| 52          | 74          | 17                | 1      | 2      | 0        | 584.660            | 0.000               | 0.000              |
| 53          | 67          | 17                | 1      | 3      | 0        | 29.757             | 0.000               | 0.000              |
| 54          | 67          | 6                 | 1      | 3      | 1        | 192.573            | 0.000               | 0.000              |
| 55          | 69          | 5                 | 1      | 4      | 2        | 465.172            | 6802.180            | 14.623             |
| 56          | 55          | 8                 | 1      | 3      | 1        | 2734.667           | 0.000               | 0.000              |

Survival: postoperatively until follow-up or death.

Censor: 1 indicates died due to tumor; 2, alive at follow-up (without recurrence or metastasis); 4, died due to non-tumor-related causes.

Stages: 1 indicates stage I; 2, stage II; 3, stage III; 4, stage IV.

R-Status—resection type: 0 indicates R0; 1, R1; 2, R2.
